# Supplementary material for: Intensification and deactivation of Sn-beta investigated in the continuous regime
Source: Royal Society of Chemistry journal article supplement (doi:10.1039/c6gc01288d), 2016-01-01
Supplement: c6gc01288d1.pdf [file c6gc01288d1.pdf]

## Extended Supplementary Information for:

### Intensification and deactivation of Sn-Beta investigated in the continuous regime

Daniele Padovan,<sup>a</sup> Charlie Parsons,<sup>a</sup> Manuel Simplicio Grasina,<sup>a</sup> and Ceri Hammond\*<sup>a</sup>

<sup>a</sup> Cardiff Catalysis Institute, Cardiff University, Main Building, Park Place, Cardiff, CF10 3AT

[hammondc4@cardiff.ac.uk](mailto:hammondc4@cardiff.ac.uk)

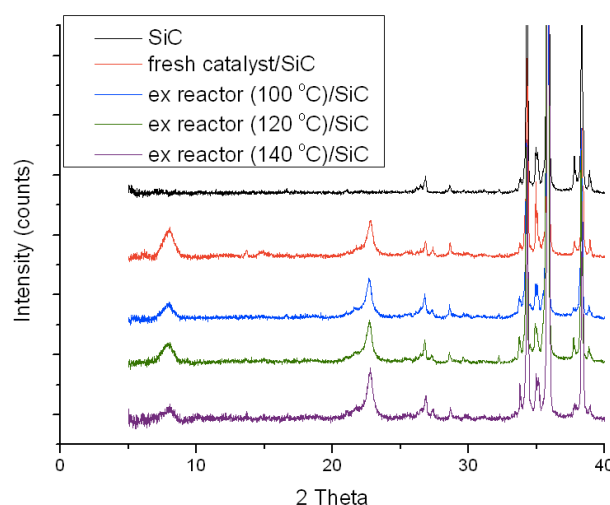

**Figure S1.** A selection of XRD patterns of ex reactor catalyst samples. From top to bottom: SiC, fresh catalyst/SiC mixture, ex reactor (100 °C) sample/SiC mixture, ex reactor (120 °C) sample/SiC mixture, ex reactor (140 °C) sample/SiC mixture. All ex reactor samples were measured after 250 h on stream.

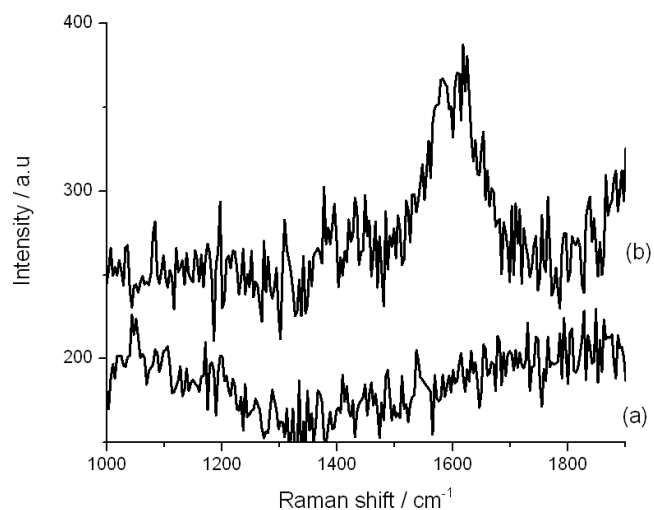

**Figure S2.** UV-Raman spectrum of (a) fresh catalyst/SiC mixture, and (b) ex reactor (140 °C) sample/SiC mixture after 150 h on stream. The presence of the carbon G-band clearly indicates the presence of carbonaceous material in the used sample.

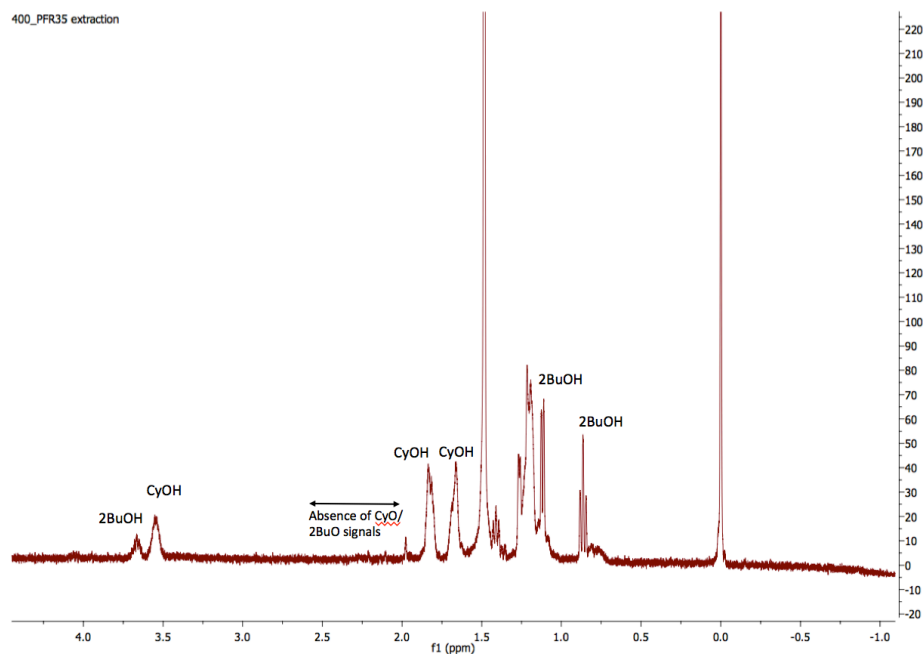

**Figure S3.** <sup>1</sup>H NMR spectra of the supernatant solution after washing the ex reactor catalyst in CD<sub>3</sub>Cl. Clear resonances from both alcohol species (2-butanol and cyclohexanol) are observed, whilst no signals from the corresponding ketones are found.

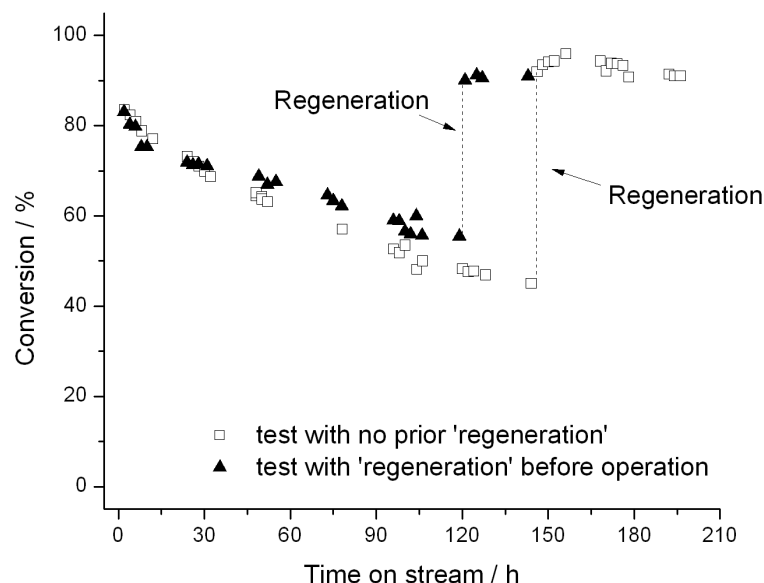

**Figure S4.** Catalytic activity of 10Sn-Beta during TH of furfural. Open squares represent the continuous experiment performed with fresh catalyst, whilst filled triangles represents a continuous test of the same sample tested after an initial 550 °C calcination prior to continuous operation.

**Table S1.** EDX analysis and porosimetry data from fresh and used Sn-Beta catalysts.

| Catalyst                                                        | Sn wt. % <sup>a,1</sup> | SSA<br>(m <sup>2</sup> g <sup>-1</sup> ) <sup>b,2</sup> | V <sub>MICRO</sub><br>(cm <sup>3</sup> g <sup>-1</sup> ) <sup>c,2</sup> | normalized<br>V <sub>MICRO</sub> (cm <sup>3</sup><br>g <sup>-1</sup> ) <sup>c,2</sup> |
|-----------------------------------------------------------------|-------------------------|---------------------------------------------------------|-------------------------------------------------------------------------|---------------------------------------------------------------------------------------|
| fresh catalyst/SiC                                              | 4.9 ± 0.5               | 66.5                                                    | 0.046                                                                   | 0.23                                                                                  |
| ex reactor (140 °C) sample/SiC<br>mixture after 150 h on stream | 4.4 ± 0.6               | 26.4                                                    | 0.022                                                                   | 0.11                                                                                  |

<sup>a</sup>Determined by EDXS; <sup>b</sup>Specific surface area determined from nitrogen adsorption using the BET equation; <sup>c</sup>Micropore volume determined from nitrogen adsorption isotherms using the de Boer *t*-plot method.

<sup>1</sup> The entire catalyst sample (included diluent) was measured. Three different areas of 29 micron of diameter were analysed and the averaged value was taken. Values are not normalised for composition (*i.e.* % catalyst in mixture) due to issues with relative dispersion and the semi-surface sensitive nature of the technique.

<sup>2</sup> The entire catalyst sample (included diluent) was measured, and these are the raw values.

<sup>3</sup> Values were normalised from the data obtained in (2) according to the relative content of catalyst in the mixture, as the diluent does not contribute to the micropore volume.
